# Supplementary material
Source: Springer Nature journal article supplement (https://www.springermedizin.de/resource/supplementary/13024_2013_584_MOESM1_ESM.pdf/9644076)

*extracellular*

APP<sub>S-β</sub>

Aβ

β

γ

APP

APP  
CTFβ

AICD

*intracellular*

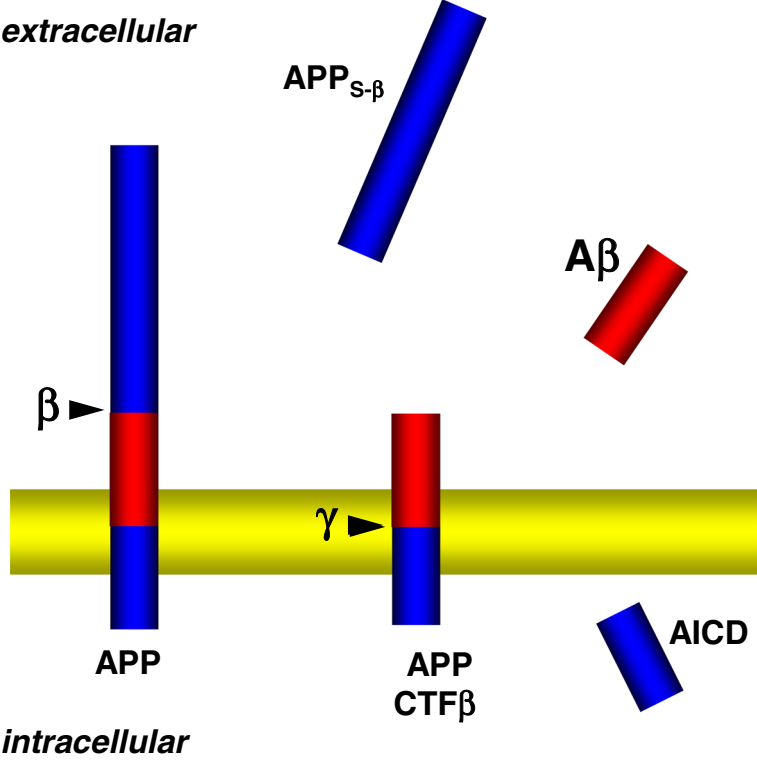

Supplement: MOESM1 [file 9644076]
